# Supplementary material
Source: MDPI journal article supplement (https://www.mdpi.com/2076-3417/10/20/7244)
Supplement: s1 [file s1]

# Supplementary Materials: Influence of Eco-Friendly Processing Aids on Silica-Based Rubber Composites

Sung Ho Song\*

Division of Advanced Materials Engineering, Kongju National University, Chungnam 330-717, Korea

\* Correspondence: shsong805@kongju.ac.kr

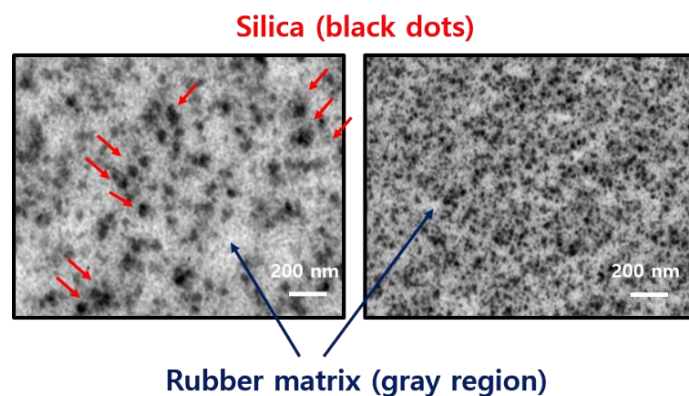

Figure S1. **(left)** TEM images of rubber composites with HCR. **(right)** TEM images of rubber composites with TPR.
